# Supplementary material
Source: publisher figshare collection journal article supplement (https://acs.figshare.com/ndownloader/files/5103685)
Supplement: Supplementary file 1 [file 5103685]

# Functionally Layered Dendrimers: A New Building Block and its Application to the Synthesis of Multichromophoric Light Harvesting Systems

William R. Dichtel, Stefan Hecht,<sup>§</sup> and Jean M. J. Fréchet,<sup>\*</sup>

*Department of Chemistry, University of California-Berkeley, Berkeley, California, 94720  
and Materials Science Division, Lawrence Berkeley National Laboratory,  
Berkeley, California, 94720-1460  
frechet@berkeley.edu*

## Supporting Information

### Experimental

**General Methods:** <sup>1</sup>H and <sup>13</sup>C NMR spectra were recorded on a Bruker AMX 300 (<sup>1</sup>H: 300 MHz, <sup>13</sup>C: 75 MHz), Bruker AM-400 (<sup>1</sup>H: 400 MHz, <sup>13</sup>C: 100 MHz) or a Bruker DRX 500 (<sup>1</sup>H: 500 MHz, <sup>13</sup>C: 125 MHz) spectrometer with TMS as internal standard. SEC measurements were performed on a Waters 150CV plus SEC system equipped with a differential refractive index detector and a M486 UV detector (254 nm detection wavelength) using THF as the mobile phase at 45 °C and a flow rate of 1 mL/min. The samples were separated through four 5 µm PL Gel columns (Polymer Laboratories) with porosities of 100 Å, 500 Å, 1000 Å and mixed C. The columns were calibrated with 18 narrow polydispersity polystyrene samples. MALDI-TOF mass spectra were measured on a Perseptive Biosystems Voyager-DE spectrometer in delayed extraction mode and an acceleration voltage of 20 keV. Samples were prepared using a 1:20 ratio of analyte (5 mg/mL in THF) to matrix solution (a saturated solution of α-cyano-4-hydroxycinnamic acid in THF). Absorption spectra were recorded in THF on a Cary 50 UV-Visible Spectrophotometer. Fluorescence spectra were measured of nitrogen saturated solutions (1cm cells, OD<sub>max</sub> < 0.1) using an ISA/SPEX Fluorolog 3.22 equipped with a 450 W Xe lamp, double excitation and double emission monochromators, and a digital photon-counting photomultiplier. Correction for variations in lamp intensity over time and

---

<sup>§</sup> Present address: Max-Planck-Institut für Kohlenforschung, Kaiser-Wilhelm-Platz 145470 Mülheim an der Ruhr.

wavelength was achieved with a solid-state silicon photodiode as the reference. The spectra were further corrected for variations in photomultiplier response over wavelength and for the path difference between the sample and the reference by multiplication with emission correction curves generated on the instrument. Polystyrene bound carbodiimide (PS-carbodiimide) was purchased from Argonaut Technologies and contained a loading of 1.28 mmol/g of carbodiimide functionality.

**Preparation of G2-(Acetonide)<sub>32</sub>[Cou]<sub>16</sub>[Naph]<sub>8</sub>TPP 1:** Porphyrin **12** (0.0050 g, 0.00095 mmol), Coumarin monomer **9** (0.011 g, 0.027 mmol), DMAP (0.0035 g, 0.028 mmol), and DPTS (0.0083 g, 0.028 mmol) were dissolved in 200  $\mu$ L of pyridine. PS-carbodiimide (0.024 g, 0.027 mmol) was added and the solution was stirred overnight. The reaction progress was monitored by MALDI-TOF spectrometry, and if the reaction did not achieve completion after overnight stirring, the mixture was filtered through a fritted funnel, the solvent evaporated, and the residue resubjected to the reaction conditions. When the reaction was complete, the crude product was purified by filtration, evaporation of the solvent, and chromatography by preparative TLC using 2:1 CH<sub>2</sub>Cl<sub>2</sub>:THF mobile phase, giving 0.0049 g of pure **2** (43% yield). **2**: <sup>1</sup>H NMR (500 MHz, THF, 25 °C, TMS):  $\delta$  8.93 (s, 16H, Cou NH), 8.83 (s, 8H, beta H), 8.63 (s, 16H, Cou vinyl), 7.81-7.11 (broad m, 124H, cou, naph, and TPP aromatic peaks), 6.87 (m, 12H, naph vinyl and TPP Ar-H), 4.50 (broad m, 96H, -CH<sub>2</sub>CONH-, all CH<sub>2</sub>O<sub>2</sub>C-), 4.48 (d, <sup>2</sup>J(H,H) = 12 Hz, 32H, CH<sub>2</sub>OC(CH<sub>3</sub>)<sub>2</sub>), 3.86 (d, <sup>2</sup>J(H,H) = 12 Hz, 32H, CH<sub>2</sub>OC(CH<sub>3</sub>)<sub>2</sub>), 2.60 (m, 96H, all  $\alpha$ -hydrogens), 1.46 (s, 48H, CH<sub>3</sub>), 1.36 (s, 48H, CH<sub>3</sub>). SEC (polystyrene standards): M<sub>n</sub> = 10350, M<sub>w</sub> = 10655, PDI = 1.02. MALDI-MS: Calcd for C<sub>558</sub>H<sub>558</sub>F<sub>24</sub>N<sub>28</sub>O<sub>216</sub> *m/z* 11928.74. Found *m/z* 11930.88. UV/Vis ( $\epsilon$ ), CHCl<sub>3</sub>: 294.9 (232000), 337.9 (165000), 423.0 (251000), 518.0 (14000), 551.0 (4970), 589 (4850), 645.0 (2250).

**Preparation of Naphthopyranone-OH 2:** 2,7-Naphthalenediol (13.30 g, 83.0 mmol) and ethyl trifluoroacetoacetate (22.93 g, 124.5 mmol) were added to a 500 mL round bottom flask cooled to 0 °C. Chilled concentrated sulfuric acid (83 mL) was added, and the resulting red solution was stirred for 4 h. The reaction mixture was poured into 500 mL of ice water, and the green precipitate was collected by filtration. Recrystallization of

the crude product from 600 mL of ethanol afforded 16.29 g of **2** as a green solid (70.0% yield). **2**:  $^1\text{H}$  NMR (500 MHz, DMSO, 25 °C, TMS):  $\delta$  10.35 (s, 1H, -OH), 8.17 (d,  $^2J(\text{H,H}) = 9$  Hz, 1H, Ar-H), 7.95 (d,  $^2J(\text{H,H}) = 8$  Hz, 1H, Ar-H), 7.67 (s, 1H, Ar-H), 7.37 (d, 1H,  $^2J(\text{H,H}) = 9$  Hz, Ar-H), 7.19 (dd,  $^2J(\text{H,H}) = 8$  Hz,  $^2J(\text{H,H}) = 3$  Hz, 1H, Ar-H), 7.13 (s, 1H, vinyl-H);  $^{13}\text{C}$  NMR (125 MHz, DMSO):  $\delta$  158.3, 157.8, 156.0, 139.8 (q,  $^3J(\text{C,F}) = 32$  Hz), 135.37, 131.4, 129.1, 125.2, 122.6 (q,  $^2J(\text{C,F}) = 275$  Hz), 116.9 (q,  $^4J(\text{C,F}) = 8$  Hz), 114.0, 107.7 (q,  $^4J(\text{C,F}) = 8$  Hz). Anal. Calcd for  $\text{C}_{14}\text{H}_7\text{O}_3\text{F}_3$ : C, 60.01; H, 2.52; F, 20.34. Found: C, 59.84; H, 2.37; F, 20.09.

**Preparation of Naphthopyranone-CO<sub>2</sub>tBu 3**: Naphthopyranone **2** (6.00 g, 21.4 mmol) was dissolved in 15 mL of DMF at 60 °C. Upon addition of  $\text{K}_2\text{CO}_3$  (5.92 g, 42.8 mmol), the reaction mixture turned red. *t*-Butyl bromoacetate (4.11 mL, 27.8 mmol) was added, and the mixture returned to a greenish yellow color while stirring overnight. The solution was cooled to rt, and the product precipitated from solution. The green solids were collected by filtration and were washed with 100 mL of water. The crude product was recrystallized from 100 mL of ethanol to give 5.897 g of pure **3** as small green needles (69.9% yield). **3**:  $^1\text{H}$  NMR (500 MHz,  $\text{CDCl}_3$ , 25 °C, TMS):  $\delta$  8.00 (d,  $^2J(\text{H,H}) = 9$  Hz, 1H, Ar-H), 7.84 (d,  $^2J(\text{H,H}) = 8$  Hz, 1H, Ar-H), 7.72 (d,  $^2J(\text{H,H}) = 2$  Hz, 1H, Ar-H), 7.37 (d,  $^2J(\text{H,H}) = 9$  Hz, 1H, Ar-H), 7.15 (dd,  $^2J(\text{H,H}) = 9$  Hz, 2 Hz, 1H, Ar-H), 7.01 (s, 1H, vinyl-H) 4.68 (s, 2H,  $\text{OCH}_2$ -), 1.51 (s, 9H,  $\text{CH}_3$ ).  $^{13}\text{C}$  NMR (125 MHz, DMSO):  $\delta$  167.4, 158.8, 158.0, 156.3, 141.2 (q,  $^3J(\text{C,F}) = 32$  Hz), 135.1, 131.1, 129.1, 126.8, 126.6 (q,  $^2J(\text{C,F}) = 276$  Hz), 118.1, 116.6 (q,  $^4J(\text{C,F}) = 8$  Hz), 115.3, 108.6, 106.2 (q,  $^4J(\text{C,F}) = 8$  Hz), 82.8, 65.3, 28.0. Anal. Calcd for  $\text{C}_{20}\text{H}_{17}\text{O}_5\text{F}_3$ : C, 60.92; H, 4.35; F, 14.45. Found: C, 61.05; H, 4.46; F, 14.61.

**Preparation of Naphthopyranone-CO<sub>2</sub>H 4**: Naphthopyranone **3** (5.00 g, 12.6 mmol) was dissolved in 26 mL. Trifluoroacetic acid (2.5 mL) was added, and the solution was stirred under nitrogen. After 3 hours, the product acid began to precipitate from solution. The cloudy solution was stirred under nitrogen for two days. The precipitate was isolated by filtration and was recrystallized from 100 mL of ethanol to give 4.21 g of **4** as extremely fluffy yellow crystals (98.2% yield). **4**:  $^1\text{H}$  NMR (500 MHz, DMSO, 25 °C, TMS):  $\delta$  13.21 (broad s, 1H,  $\text{CO}_2\text{H}$ ), 8.23 (d,  $^2J(\text{H,H}) = 9$  Hz, 1H, Ar-H), 8.05 (d,  $^2J(\text{H,H}) = 9$  Hz, 1H, Ar-H), 7.58 (d,  $^2J(\text{H,H}) = 2$  Hz, 1H, Ar-H), 7.47 (d,  $^2J(\text{H,H}) = 9$  Hz, 1H, Ar-

H), 7.36 (dd,  $^2J(\text{H,H}) = 9 \text{ Hz}$ , 2 Hz, 1H, Ar-H), 7.17 (s, 1H, vinyl-H), 4.82 (s, 2H,  $\text{CH}_2$ ).  $^{13}\text{C}$  NMR (125 MHz, DMSO):  $\delta$  169.7, 158.2, 157.6, 156.0, 139.2 (q,  $^3J(\text{C,F}) = 31 \text{ Hz}$ ), 135.4, 131.4, 128.4, 126.3, 124.0 (q,  $^2J(\text{C,F}) = 275 \text{ Hz}$ ), 117.7 (q,  $^4J(\text{C,F}) = 9 \text{ Hz}$ ), 117.0, 115.3, 107.9, 106.2 (q,  $^4J(\text{C,F}) = 9 \text{ Hz}$ ). Anal. Calcd for  $\text{C}_{16}\text{H}_9\text{O}_5\text{F}_3$ : C, 56.82; H, 2.68; F, 16.85. Found: C, 57.02; H, 2.83; F, 16.66.

**Preparation of (Acetonide)[Naph]-OH 6:** 1-[3-(Dimethylamino)propyl]-3-ethylcarbodiimide hydrochloride (1.56 g, 8.13 mmol) was added to a solution of 5-amino-5-hydroxymethyl-2,2-dimethyl-1,3-dioxane **5**<sup>3</sup> (2.14 g, 1.33 mmol), 1-hydroxybenzotriazole hydrate (1.24 g, 8.13 mmol), and naphthopyranone **8** (2.50 g, 7.39 mmol) in 20 mL of DMF at 0 °C. The mixture was allowed to warm to room temperature while stirring overnight. The reaction mixture was poured in 250 mL ethyl acetate and was washed with 3 x 150 mL of 0.3 M  $\text{NaHSO}_4$ , 3 x 150 mL of 0.3 M  $\text{Na}_2\text{CO}_3$ , and 1 x 150 mL of brine. The organic layer was dried over  $\text{MgSO}_4$ , filtered, and the solvent evaporated. Chromatography (silica gel) eluting with 7:93 methanol/dichloromethane afforded 2.10 g of **6** (48.6% yield). **6:**  $^1\text{H}$  NMR (500 MHz,  $\text{CDCl}_3$ , 25 °C, TMS):  $\delta$  8.01 (d,  $^2J(\text{H,H}) = 9 \text{ Hz}$ , 1H, Ar-H), 7.88 (d,  $^2J(\text{H,H}) = 9 \text{ Hz}$ , 1H, Ar-H), 7.86 (d,  $^2J(\text{H,H}) = 2 \text{ Hz}$ , 1H, Ar-H), 7.60 (s, 1H, NH), 7.40 (d,  $^2J(\text{H,H}) = 9 \text{ Hz}$ , 1H, Ar-H), 7.31 (dd,  $^2J(\text{H,H}) = 9 \text{ Hz}$ , 2H, 1H, Ar-H), 7.02 (s, 1H, vinyl-H), 4.85 (br s, 1 H, -OH), 4.69 (s, 2H,  $\text{CH}_2\text{CONH}$ ), 3.88 (s, 4H,  $\text{CH}_2\text{O}$ ), 3.76 (s, 2H,  $\text{CH}_2\text{OH}$ ), 1.45 (s, 3H,  $\text{CH}_3$ ), 1.32 (s, 3H,  $\text{CH}_3$ ).  $^{13}\text{C}$  NMR (125 MHz,  $\text{CDCl}_3$ ):  $\delta$  168.4, 159.1, 156.8, 156.5, 140.4 (q,  $^3J(\text{C,F}) = 31 \text{ Hz}$ ), 135.1, 131.4, 129.2, 127.2, 125.4 (q,  $^2J(\text{C,F}) = 267 \text{ Hz}$ ), 117.2, 116.9 (q,  $^4J(\text{C,F}) = 9 \text{ Hz}$ ), 116.0, 109.4, 108.3 (q,  $^4J(\text{C,F}) = 9 \text{ Hz}$ ), 99.0, 67.3, 64.6, 63.7, 55.4, 28.1, 18.7. Calcd for  $\text{C}_{23}\text{H}_{22}\text{F}_3\text{NO}_7$   $m/z = 482.143540$ . Found  $m/z = 482.142662$ .

**Preparation of (Acetonide)[Naph]-CO<sub>2</sub>H 7:** DMAP (0.051 g, 0.42 mmol) was added to a solution of succinic anhydride (0.106 g, 1.06 mmol) and (Acetonide)[Naph]-OH **6** (0.500 g, 1.04 mmol) in 4 mL acetonitrile. The mixture was refluxed overnight, then cooled back to rt. The solvent was evaporated, and the resulting solid was loaded onto silica gel in the presence of 0.2 mL triethylamine. The dry silica gel was loaded onto a column and was flushed with 300 mL of a 3:1 mixture of  $\text{CH}_2\text{Cl}_2$ :THF. The product was eluted using a 3:1  $\text{CH}_2\text{Cl}_2$ :THF mixture containing 0.2% acetic acid. The solvent was evaporated from the combined column fractions, and the product was redissolved in 300

mL ethyl acetate. The ethyl acetate was washed with 3 x 300 mL 0.1 M NaHSO<sub>4</sub>, 1 x 150 mL brine, was dried over MgSO<sub>4</sub>, and the solvent evaporated to give 0.320 g of **7** as a yellow solid (52.9% yield). **7**: <sup>1</sup>H NMR (500 MHz, CDCl<sub>3</sub>, 25 °C, TMS): δ 7.98 (d, <sup>2</sup>J(H,H) = 9 Hz, 1H, Ar-H), 7.85 (d, <sup>2</sup>J(H,H) = 9 Hz, 1H, Ar-H), 7.76 (d, <sup>2</sup>J(H,H) = 2 Hz, 1H, Ar-H), 7.36 (d, <sup>2</sup>J(H,H) = 9 Hz, 1H, Ar-H), 7.34 (dd, <sup>2</sup>J(H,H) = 9 Hz, 2 Hz, 1H, Ar-H), 7.13 (s, 1H, Ar-H), 6.99 (s, 1H, vinyl-H), 4.58 (s, 2H, -CH<sub>2</sub>CONH-), 4.56 (s, 2H, -CH<sub>2</sub>O<sub>2</sub>CCH<sub>2</sub>-), 4.36 (d, <sup>2</sup>J(H,H) = 12 Hz, 2H, CH<sub>2</sub>OC(CH<sub>3</sub>)<sub>2</sub>), 3.78 (d, <sup>2</sup>J(H,H) = 12 Hz, 2H, CH<sub>2</sub>OC(CH<sub>3</sub>)<sub>2</sub>), 2.60 (m, 4H, -O<sub>2</sub>CCH<sub>2</sub>CH<sub>2</sub>CO<sub>2</sub>-), 1.41 (s, 6H, CH<sub>3</sub>). <sup>13</sup>C NMR (100 MHz, CDCl<sub>3</sub>): δ 176.4, 172.6, 168.1, 158.7, 157.0, 156.4, 141.1 (q, <sup>3</sup>J(C,F) = 31 Hz), 135.1, 131.3, 129.1, 127.1, 125.9 (q, <sup>2</sup>J(C,F) = 267 Hz), 117.6, 116.9 (q, <sup>4</sup>J(C,F) = 9 Hz), 115.9, 108.7, 107.1 (q, <sup>4</sup>J(C,F) = 9 Hz), 104.9, 99.8, 67.2, 63.6, 62.6, 61.8, 60.4, 53.4, 49.9, 29.2, 28.7, 27.2. Calcd for C<sub>27</sub>H<sub>26</sub>F<sub>3</sub>NO<sub>10</sub> *m/z* = 582.157020 Found *m/z* = 582.158706. UV/Vis (ε), CHCl<sub>3</sub>: 287.0 (4970), 359.0 (8620).

**Preparation of (Acetonide)[Cou]-OH **8**:** 1-[3-(Dimethylamino)propyl]-3-ethylcarbodiimide (13.1 g, 68.2 mmol) was added to a solution of **5**<sup>3</sup> (10.0 g, 62.0 mmol) and coumarin-3-carboxylic acid (11.8 g, 62.0 mmol) in 300 mL of CH<sub>2</sub>Cl<sub>2</sub> at 0 °C. The mixture was allowed to warm to room temperature while stirring overnight. The reaction mixture was washed with 1M NaHSO<sub>4</sub> and brine, dried over MgSO<sub>4</sub>, and the solvent evaporated. Chromatography (silica gel, 3% methanol in CH<sub>2</sub>Cl<sub>2</sub>) afforded 12.50 g of **8** as a white solid (60.5%). **8**: <sup>1</sup>H NMR (500 MHz, CDCl<sub>3</sub>, 25 °C, TMS): δ 9.82 (broad s, 1 H, NH), 8.91 (s, 1H, HC=C), 7.70 (m, 2H, aryl), 7.42 (m, 2H, aryl), 5.10 (t, <sup>3</sup>J(H,H) = 7 Hz, 1 H, OH), 3.98 (d, <sup>2</sup>J(H,H) = 11 Hz, CHHO), 3.94 (d, <sup>2</sup>J(H,H) = 11 Hz, CHHO), 3.81 (d, <sup>3</sup>J(H,H) = 7 Hz, 2 H, CH<sub>2</sub>OH), 1.52 (s, 3H, CH<sub>3</sub>), 1.49 (s, 3H, CH<sub>3</sub>); <sup>13</sup>C NMR (125 MHz, CDCl<sub>3</sub>): δ 162.3, 161.3, 154.6, 148.7, 134.4, 129.9, 125.4, 118.5, 118.4, 116.7, 99.0, 64.4, 55.9, 27.4, 19.7. Anal. Calcd for C<sub>17</sub>H<sub>19</sub>O<sub>6</sub>N: C, 61.25; H, 5.75; N, 4.20. Found: C, 61.07; H, 5.67; N, 3.99.

**Preparation of (Acetonide)[Cou]-CO<sub>2</sub>H **9**:** DMAP (0.18 g, 1.5 mmol) was added to a solution of **9** (5.00 g, 15.0 mmol) and succinic anhydride (1.58 g, 15.8 mmol) in 125 mL of acetonitrile and was refluxed for 18 h. The mixture was cooled, and the solvent evaporated. Chromatography (silica gel, 5% methanol in CH<sub>2</sub>Cl<sub>2</sub>) afforded 3.18 g of **9** as a white solid (49% yield). **9**: <sup>1</sup>H NMR (500 MHz, CDCl<sub>3</sub>, 25 °C, TMS): δ 9.00 (broad s,

1 H, NH), 8.87 (s, 1 H, HC=C), 7.69 (m, 2H, aryl), 7.41 (m, 2H, aryl), 4.65 (s, 2 H, CH<sub>2</sub>O<sub>2</sub>C), 4.29 (d, <sup>2</sup>*J*(H,H) = 12 Hz, 2 H, CHHO), 3.96 (d, <sup>2</sup>*J*(H,H) = 12 Hz, 2 H, CHHO), 2.66 (m, 4 H, CH<sub>2</sub>CH<sub>2</sub>CO<sub>2</sub>H), 1.52 (s, 3 H, CH<sub>3</sub>), 1.44 (s, 3 H, CH<sub>3</sub>); <sup>13</sup>C NMR (125 MHz, CDCl<sub>3</sub>): δ 175.6, 171.6, 161.7, 161.5, 148.5, 134.3, 129.9, 125.4, 118.6, 118.5, 116.7, 98.9, 63.4, 62.7, 53.2, 28.9, 28.6, 24.2, 22.8. HRMS (FAB): Calcd for C<sub>21</sub>H<sub>23</sub>NO<sub>9</sub> *m/z* = 434.1451. Found *m/z* = 434.1461. UV/Vis (ε), CHCl<sub>3</sub>: 290.0 (15600), 326.0 (8930).

### Scheme 1. Synthesis of Porphyrin 10.

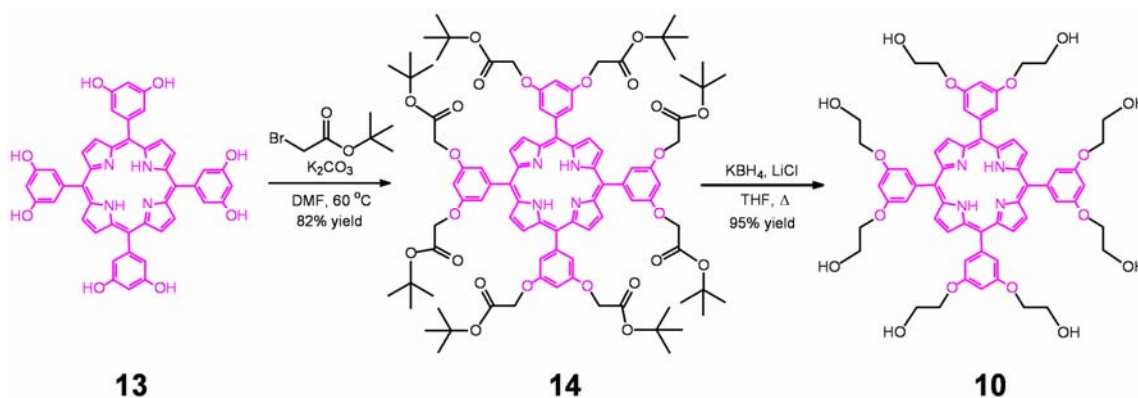

#### Preparation of tetrakis(3,5-bis(2'-hydroxy-1'-ethoxy)phenyl)porphyrin 10:

Porphyrin **14** (0.300 g, 0.181 mmol) was dissolved in 10.0 mL THF and heated to reflux. KBH<sub>4</sub> (0.156 g, 2.90 mmol) and LiCl (0.123 g, 2.90 mmol) were added and the mixture was stirred for 7 hours. The reaction was monitored by MALDI-TOF MS. When complete, the reaction mixture was poured into 20 mL THF, which was washed with 3 x 10 mL of a 4:1 mixture of brine and 1M NaHSO<sub>4</sub>, 15 mL of a 4:1 mixture of brine and 1M Na<sub>2</sub>CO<sub>3</sub>, and 15 mL of brine. Drying over MgSO<sub>4</sub> followed by evaporation of the solvent gave 0.189 g of **10** (95.4% yield). **10**: <sup>1</sup>H NMR (400 MHz, *d*<sub>3</sub>-MeOD, 25 °C, TMS): δ 9.0 (broad s, 8H, β H), 7.42 (d, <sup>4</sup>*J*(H,H) = 2 Hz, 8H, *o*-aryl H), 6.99 (t, <sup>4</sup>*J*(H,H) = 2 Hz, 4H, *p*-aryl H), 4.18 (m, 16H, TPP-OCH<sub>2</sub>-), 3.89 (m, 16H, TPP-OCH<sub>2</sub>CH<sub>2</sub>-). HRMS (FAB): Calcd for C<sub>60</sub>H<sub>62</sub>N<sub>4</sub>O<sub>16</sub> *m/z* = 1094.4161. Found *m/z* = 1094.4174.

**Preparation of G1-(Acetonide)<sub>8</sub>[Naph]<sub>8</sub>TPP 11:** PS-carbodiimide (0.086 g, 0.097 mmol) was added to a solution containing porphyrin **10** (0.035 g, 0.032 mmol),

naphthopyranone monomer **7** (0.225 g, 0.386 mmol), DMAP (0.012 g, 0.097 mmol), and DPTS (0.019 g, 0.064 mmol) in 1.6 mL pyridine. The reaction progress was monitored by MALDI-TOF spectrometry, and when complete, the mixture was filtered through a fritted funnel and the solvent was evaporated under high vacuum. Chromotography (silica gel) of the crude reaction mixture using 2:1 CH<sub>2</sub>Cl<sub>2</sub>:THF afforded pure **11** (0.150 g, 83.3% yield) in the early fractions as an amorphous purple solid. **11**: <sup>1</sup>H NMR (500 MHz, CDCl<sub>3</sub>, 25 °C, TMS): δ 8.82 (s, 8H, beta-H), 7.62 (m, 8H, Naph Ar-H), 7.61 (m, 8H, NH), 7.58 (s, 8H, Naph Ar-H), 7.32 (d, <sup>2</sup>J(H,H) = 2 Hz, 8H, Naph Ar-H), 7.23 (dd, <sup>2</sup>J(H,H) = 9 Hz, 3 Hz, 8H, Naph Ar-H), 7.03 (s, 8H, TPP Ar-H), 6.96 (d, <sup>2</sup>J(H,H) = 9 Hz, 8H, Naph Ar-H), 6.86 (m, 12H, Naph vinyl and TPP Ar-H), 4.55 (s, 16H, -CH<sub>2</sub>CONH-), 4.47 (s, 16H, -CH<sub>2</sub>O<sub>2</sub>CCH<sub>2</sub>-), 4.42 (m, 16H, TPP-OCH<sub>2</sub>-), 4.34 (d, <sup>2</sup>J(H,H) = 12 Hz, 16H, CH<sub>2</sub>OC(CH<sub>3</sub>)<sub>2</sub>), 4.20 (m, 16H, TPP-OCH<sub>2</sub>CH<sub>2</sub>O-), 3.76 (d, <sup>2</sup>J(H,H) = 12 Hz, <sup>2</sup>J(H,H) = 12 Hz, CH<sub>2</sub>OC(CH<sub>3</sub>)<sub>2</sub>), 2.65 (m, 32H, -O<sub>2</sub>CCH<sub>2</sub>CH<sub>2</sub>CO<sub>2</sub>-), 1.38 (s, 24H, CH<sub>3</sub>), 1.36 (s, 24H, CH<sub>3</sub>). MALDI-MS: Calcd for C<sub>276</sub>H<sub>254</sub>F<sub>24</sub>N<sub>12</sub>O<sub>88</sub> *m/z* 5602.96. Found *m/z* 5604.02. UV/Vis (ε), CHCl<sub>3</sub>: 286.9 (41200), 364.0 (75900), 423.0 (255000), 516.0 (11400), 551.0 (2400), 591.0 (2470), 649.9 (1180).

**Preparation of G1-(OH)<sub>16</sub>[Naph]<sub>8</sub>TPP **12**:** Porphyrin **11** (0.080 g, 0.014 mmol) was added to a 10 mL round bottom flask. 1.2 mL of acetonitrile was added, and the mixture was heated to 60 °C. 0.34 mL of a borate buffer (pH 7, 20 mM) was added dropwise, after which the porphyrin remained undissolved. THF (0.1 mL) and cerium ammonium nitrate (0.0040 g, 0.0073 mmol) were added and the solution was stirred for five hours. The reaction progress was monitored by MALDI-TOF spectrometry, and when complete, the reaction mixture was poured in 20 mL THF. The THF was washed with 2 x 10 mL saturated NaHCO<sub>3</sub>, 10 mL brine, was dried over MgSO<sub>4</sub>, filtered and the solvent evaporated to give **12** (0.049 g, 59.6% yield) as an amorphous purple solid. **12**: <sup>1</sup>H NMR (500 MHz, THF, 25 °C, TMS): δ 8.86 (s, 8H, beta-H), 7.71 (m, 24H, Naph Ar-H, NH), 7.38 (d, <sup>2</sup>J(H,H) = 2 Hz, 8H, Naph Ar-H), 7.22 (dd, <sup>2</sup>J(H,H) = 9 Hz, 2 Hz, 8H, Naph Ar-H), 7.05 (d, <sup>2</sup>J(H,H) = 9 Hz, 8H, Naph Ar-H), 6.99 (s, 8H, TPP Ar-H), 6.95 (m, 12 H, TPP Ar-H and Naph vinyl-H), 4.52 (s, 16H, -CH<sub>2</sub>CONH-), 4.44 (m, 16H, TPP-OCH<sub>2</sub>-), 4.33 (d, <sup>2</sup>J(H,H) = 12 Hz, 32H, CH<sub>2</sub>OC(CH<sub>3</sub>)<sub>2</sub>, TPP-OCH<sub>2</sub>CH<sub>2</sub>O-), 3.72 (m, 16H,

CH<sub>2</sub>OH), 3.64 (m, 16H, CH<sub>2</sub>OH), 2.55 (m, 32H, -O<sub>2</sub>CCH<sub>2</sub>CH<sub>2</sub>CO<sub>2</sub>-). MALDI-MS: Calcd for C<sub>252</sub>H<sub>222</sub>F<sub>24</sub>N<sub>12</sub>O<sub>88</sub> *m/z* 5282.45. Found *m/z* 5274.93.

**Preparation of 5,10,15,20-Tetrakis(3',5'-dihydroxyphenyl)porphyrin 13.**<sup>3</sup> 5,10,15,20-Tetrakis(3',5'-dimethoxyphenyl)porphyrin<sup>1</sup> (1.50 g, 1.75 mmol) was dissolved in 250 mL of dry CH<sub>2</sub>Cl<sub>2</sub> and the solution was cooled to 0 °C. Boron tribromide (17.0 mL of a 0.91 M solution in CH<sub>2</sub>Cl<sub>2</sub>, 15.4 mmol) was added over a period of 0.5 h. It was stirred at rt for additional 24 h. Excess reagent was quenched with methanol, 5 mL of triethylamine and 200 mL of water were added, and the mixture was stirred for 18 h. Evaporation of the organic solvent followed by addition of water and filtration afforded the desired product as purple crystals (1.30 g, 100%). Characterization was in agreement with the literature.<sup>3</sup>

**Preparation of Tetrakis{di-*t*-butyl 2,2'-[(3,5-phenylene)bis(oxy)]diacetate}porphyrin 14:** Porphyrin **13** (0.200 g, 0.269 mmol) and *t*-butyl bromoacetate (0.48 mL, 3.23 mmol) were added to 0.5 mL of DMF. Potassium carbonate (0.595 g, 4.31 mmol) was added and the mixture was heated to 60 °C and stirred for six hours. The course of the reaction was monitored by MALDI-TOF mass spectrometry. After the reaction was complete, the reaction mixture was poured into 30 mL of ethyl acetate. The ethyl acetate mixture was filtered through celite and washed with 3 x 25 mL 1M NaHSO<sub>4</sub>, brine, dried over MgSO<sub>4</sub>, and the solvent evaporated. Chromatography (silica gel) eluting with 15:85 ethyl acetate/hexanes gradually increasing to 50:50 ethyl acetate/hexanes afforded 0.366 g of **14** (82.2%). **14**: <sup>1</sup>H NMR (500 MHz, CDCl<sub>3</sub>, 25 °C, TMS): δ 8.88 (s, 8H, β H), 7.38 (d, 8H, *o*-aryl H, <sup>4</sup>*J*(H,H) = 2 Hz), 6.96 (t, 4H, *p*-aryl H, (H,H) = 2 Hz), 4.67 (s, 16H, -OCH<sub>2</sub>CO<sub>2</sub>-), 1.43 (s, 72H, CH<sub>3</sub>), -2.93 (s, 2H, NH). HRMS (FAB): Calcd for C<sub>92</sub>H<sub>110</sub>N<sub>4</sub>O<sub>24</sub> *m/z* = 1654.7510. Found *m/z* = 1654.7513.

## References

- (1) Rocha Gonsalves, A. M. d.; Varejao, J. M. T. B.; Pereira, M. M. *J. Heterocyclic Chem.* **1991**, 28, 635.



- (2) James, D. A.; Arnold, D. P.; Parsons, P. G. *J. Photochem. Photobiol.* **1994**, 59, 441.
- (3) Forbes, D. C.; Ene, D. G.; Doyle, M. P. *Synthesis* **1998**, 879.
